# Supplementary material for: Pharmacological inhibition of epidermal growth factor receptor attenuates intracranial aneurysm formation by modulating the phenotype of vascular smooth muscle cells
Source: PubMed Central journal article supplement (PMC8673708; doi:10.1111/cns.13735), 2021-11-02

### Full unedited blots for Figure 2A

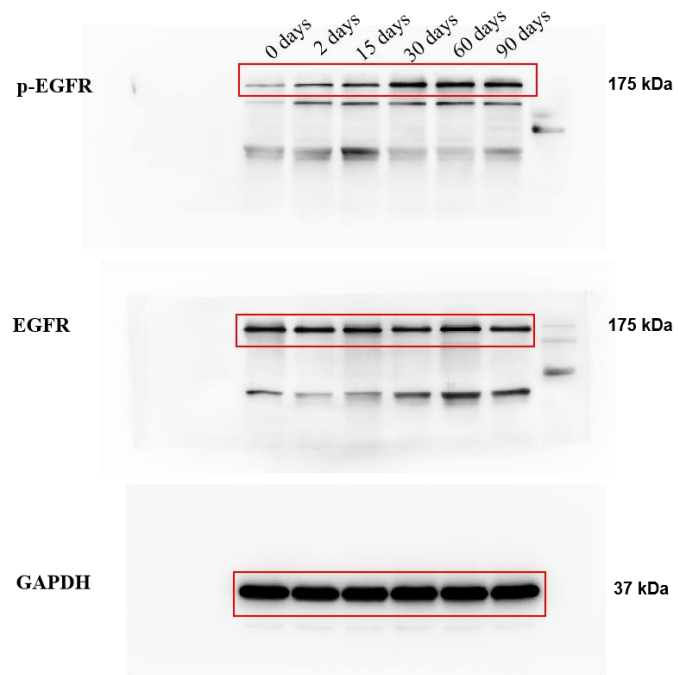

### Full unedited blots for Figure 2D

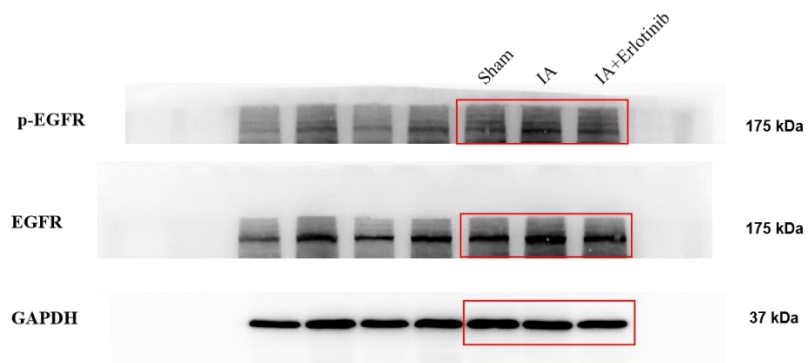



### Full unedited blots for Figure 6D

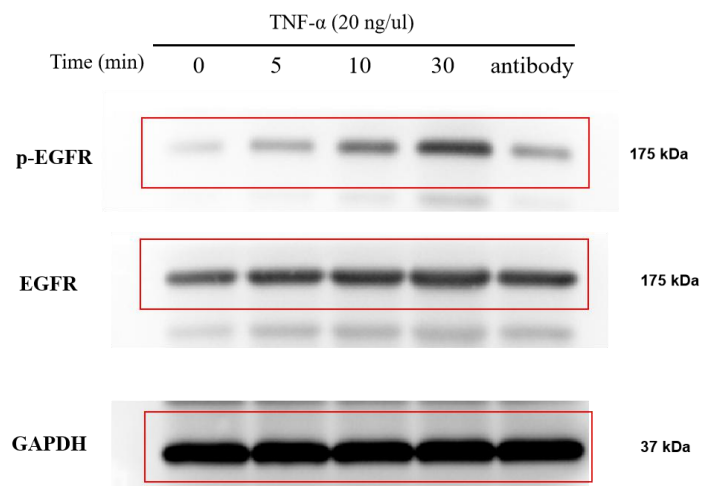

### Full unedited blots for SI Figure 2A

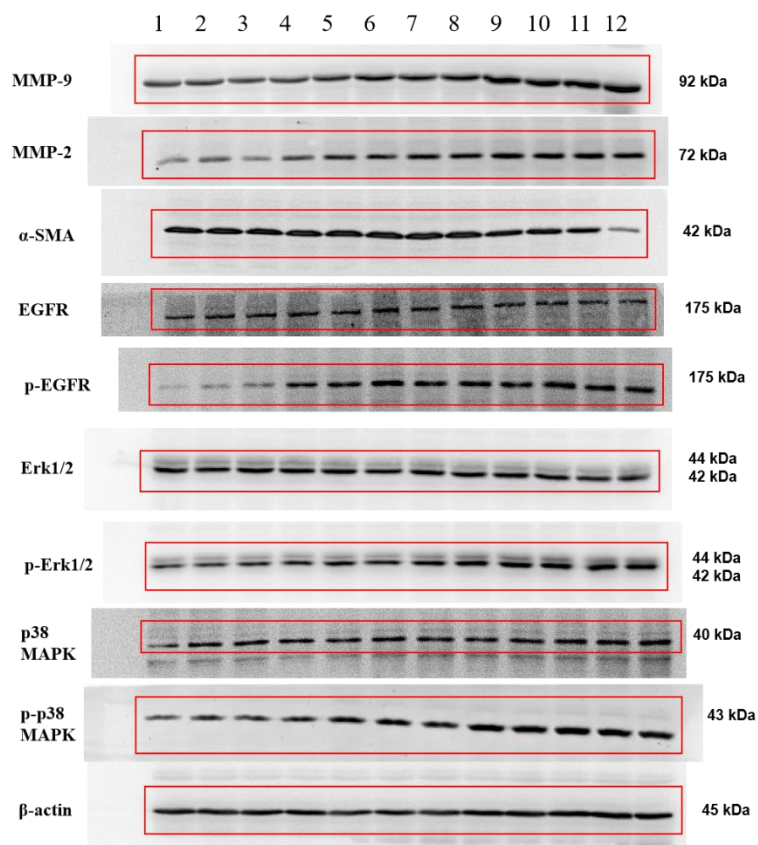

### Full unedited blots for SI Figure 3

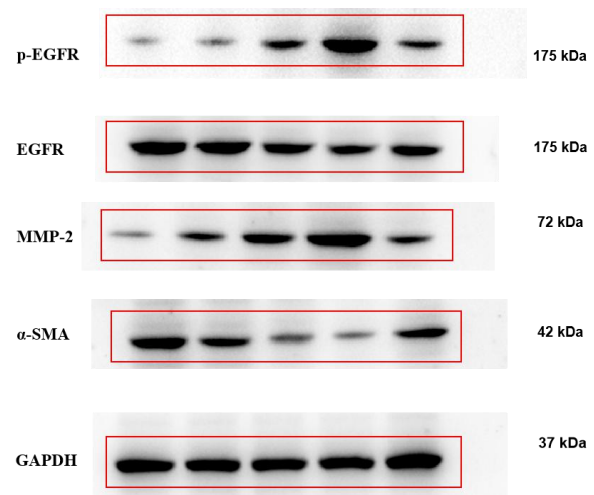

Supplement: CNS-28-64-s001.pdf [file CNS-28-64-s001.pdf]
