# Supplementary material for: Pharmacological inhibition of epidermal growth factor receptor attenuates intracranial aneurysm formation by modulating the phenotype of vascular smooth muscle cells
Source: PubMed Central journal article supplement (PMC8673708; doi:10.1111/cns.13735), 2021-11-02
Supplement: CNS-28-64-s002.pdf [file CNS-28-64-s002.pdf]

1 Supporting information

2 **Table S1.** Incidence of IA in each group according to statistical analysis

| Groups         | Grade 0 | Grade 1 | Grade 2 | Grade 3 | Kruskal-Wallis test |
|----------------|---------|---------|---------|---------|---------------------|
| Sham           | 10      | 0       | 0       | 0       | $P \leq 0.001(H =$  |
| IA             | 0       | 1       | 6       | 3       | 22.26)              |
| IA + erlotinib | 3       | 5       | 2       | 0       |                     |

3

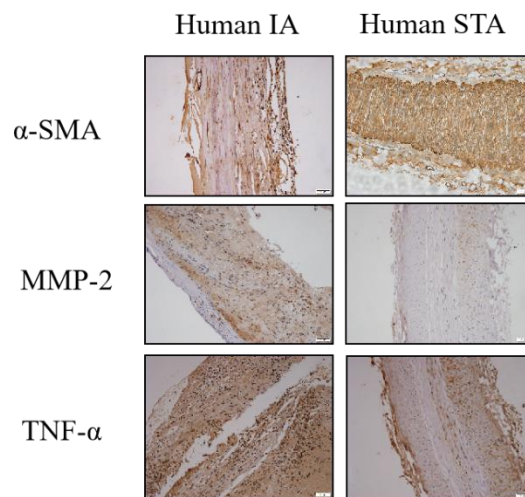

4

5 **Figure S1.** Tissue samples were from unruptured human IA (left) and human STA

6 (right). The tissue sections were stained for  $\alpha$ -SMA (brown), MMP-2 (brown) and

7 TNF- $\alpha$  (brown) by IHC. Representative images were shown.

8

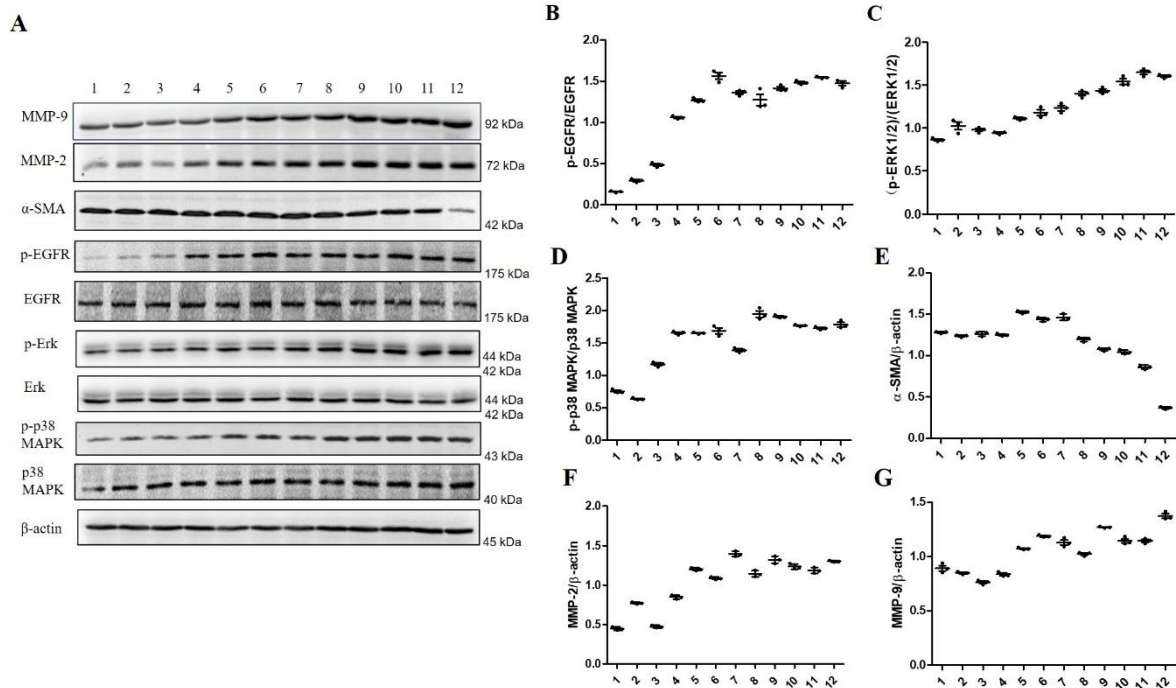

1

2 **Figure S2.** EGFR activation and downstream signals of VSMCs in *in vitro* co-culture  
3 cell models with stimulation of hemodynamics. **A:** Expression levels of p-EGFR,  
4 EGFR, p-Erk1/2, Erk1/2, p-p38MAPK, p38MAPK, α-SMA, MMP-2 and MMP-9  
5 with the extension of stimulation time and strength of WSS. (1: 0 dyn/cm<sup>2</sup> + 24h; 2: 0  
6 dyn/cm<sup>2</sup> + 48h; 3: 0 dyn/cm<sup>2</sup> + 72h; 4: 4 dyn/cm<sup>2</sup> + 24h; 5: 4 dyn/cm<sup>2</sup> + 48h; 6: 4  
7 dyn/cm<sup>2</sup> + 72h; 7: 12 dyn/cm<sup>2</sup> + 24h; 8: 12 dyn/cm<sup>2</sup> + 48h; 9: 12dyn/cm<sup>2</sup> + 72h; 10:  
8 36 dyn/cm<sup>2</sup> + 24h; 11: 36 dyn/cm<sup>2</sup> + 48h; 12: 36 dyn/cm<sup>2</sup> +72h). **B, C, and D:** The  
9 expression levels of p-EGFR, p-Erk and p-p38 MAPK were quantified and  
10 normalized by their unphosphorylated forms. **E, F and G:** The expression of α-SMA,  
11 MMP-2 and MMP-9 were quantified and normalized by β-actin. Data are represented  
12 as the mean ± SD.

13

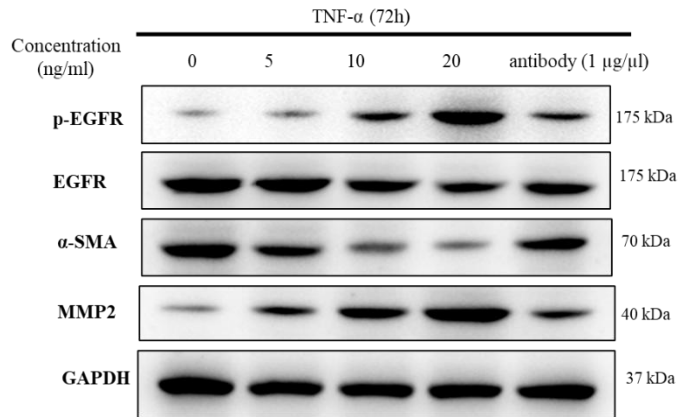

1

2 **Figure S3.** Protein expression of p-EGFR, EGFR,  $\alpha$ -SMA and MMP-2 in VSMCs  
 3 stimulated by TNF- $\alpha$  (20 ng/ $\mu$ l) with different concentrations and TNF- $\alpha$  antibody (1  
 4  $\mu$ g/ $\mu$ l) analyzed by western blot.
