# Supplementary material for: Pharmacological inhibition of epidermal growth factor receptor attenuates intracranial aneurysm formation by modulating the phenotype of vascular smooth muscle cells
Source: PubMed Central journal article supplement (PMC8673708; doi:10.1111/cns.13735), 2021-11-02

High magnification pics of Figure 4C

C

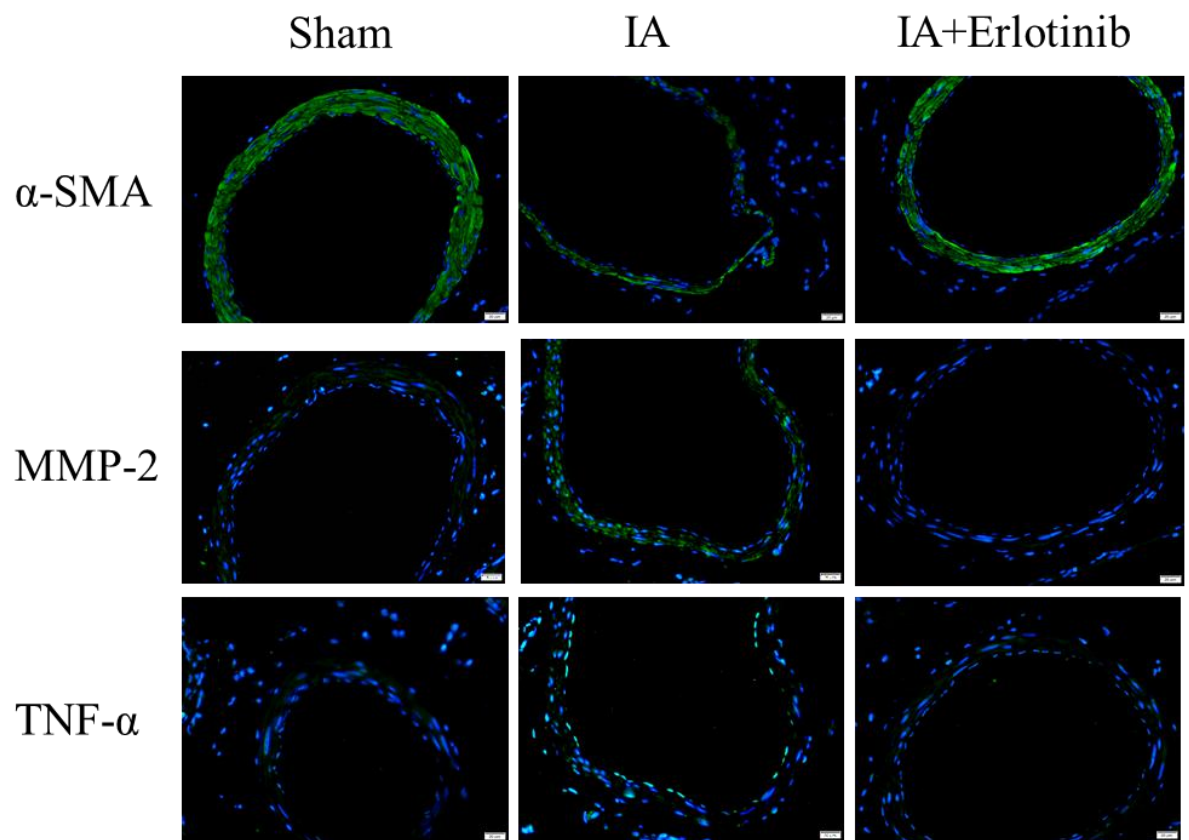

Supplement: CNS-28-64-s003.pdf [file CNS-28-64-s003.pdf]
